# Supplementary material for: <em>De Novo</em> Assembly and Annotation of 11 Diverse Shrub Willow (<em>Salix</em>) Genomes Reveals Novel Gene Organization in Sex-Linked Regions
Source: Preprints.org preprint supplement (doi:10.20944/preprints202212.0185.v1), 2022-12-12
Supplement: Supplementary file 1 [file supplementary]

## Sheet: Sheet1
GeneID	transcriptID	Arabi_sympol	Arabi_defline	defline	compound	best_hit_arabi	P94006	P94001	P63	P294	P295	P336	SH3	P04FF016	P07MBG5027	JORR	P04BN051
Sapur.001G041500	Sapur.001G041500.1	ATCHS,CHS,TT4	Chalcone and stilbene synthase family protein	chalcone synthase	chalcone	AT5G13930.1	1	2	1	2	3	2	2	2	2	3	4
Sapur.001G041600	Sapur.001G041600.1	ATCHS,CHS,TT4	Chalcone and stilbene synthase family protein	chalcone synthase	chalcone	AT5G13930.1	2	0	0	0	0	0	0	0	0	0	0
Sapur.001G098300	Sapur.001G098300.1		Terpenoid synthases superfamily protein	phytoene synthase	phytoene	AT1G62730.1	0	0	0	0	0	0	0	0	0	0	0
Sapur.001G109500	Sapur.001G109500.1	ATPRR1,PRR1	pinoresinol reductase 1	pinoresinol-lariciresinol reductase-like protein	isosalicin; tremuloidin; phenolic glycoside	AT1G32100.1	1	1	2	2	2	2	2	1	1	1	1
Sapur.001G109600	Sapur.001G109600.1	ATPRR1,PRR1	pinoresinol reductase 1	phenylcoumaran benzylic ether reductase-like protein	isosalicin; tremuloidin; phenolic glycoside	AT1G32100.1	1	2	1	1	1	1	1	1	1	1	1
Sapur.002G040800	Sapur.002G040800.1		Chalcone-flavanone isomerase family protein	chalcone-flavanone isomerase	chalcone; flavenoid	AT3G63170.1	2	1	2	1	1	1	1	2	1	1	1
Sapur.002G045300	Sapur.002G045300.1	PSY	PHYTOENE SYNTHASE	phytoene synthase	phytoene	AT5G17230.2	2	1	1	1	1	1	1	1	1	1	2
Sapur.002G045800	Sapur.002G045800.1	HPD,PDS1	phytoene desaturation 1	4-hydroxyphenylpyruvate dioxygenase	phytoene	AT1G06570.1	1	1	2	2	2	1	1	1	1	1	1
Sapur.002G092600	Sapur.002G092600.1	SQE1,XF1	FAD/NAD(P)-binding oxidoreductase family protein	squalene monooxygenase	squalene	AT1G58440.1	1	1	1	0	0	0	1	0	0	1	1
Sapur.002G115600	Sapur.002G115600.1	LAP6	Chalcone and stilbene synthase family protein	chalcone synthase family protein, putative	chalcone	AT1G02050.1	1	1	1	1	1	1	1	1	1	1	2
Sapur.002G181900	Sapur.002G181900.1	PDE226,PDS,PDS3	phytoene desaturase 3	chromoplast phytoene desaturase	phytoene	AT4G14210.1	0	1	0	2	0	0	0	0	1	0	1
Sapur.003G133400	Sapur.003G133400.1	ATCHS,CHS,TT4	Chalcone and stilbene synthase family protein	chalcone synthase	chalcone	AT5G13930.1	1	2	1	1	1	1	1	1	1	2	1
Sapur.003G133500	Sapur.003G133500.1	ATCHS,CHS,TT4	Chalcone and stilbene synthase family protein	chalcone synthase	chalcone	AT5G13930.1	1	1	1	1	1	1	1	1	1	1	0
Sapur.003G133600	Sapur.003G133600.1	ATCHS,CHS,TT4	Chalcone and stilbene synthase family protein	chalcone synthase	chalcone	AT5G13930.1	1	1	1	1	1	1	1	1	1	1	2
Sapur.004G018300	Sapur.004G018300.1	ATTPS14,TPS14	terpene synthase 14	(3S)-linalool/(E)-nerolidol/(E,E)-geranyl linalool synthase	terpene; linalool	AT1G61680.1	1	1	2	4	1	2	1	2	1	4	3
Sapur.004G024600	Sapur.004G024600.1	GES,TPS04,TPS4	terpene synthase 04	(E)-nerolidol/(E,E)-geranyl linalool synthase	terpene; linalool	AT1G61120.1	1	1	1	1	1	2	0	1	1	0	2
Sapur.004G024700	Sapur.004G024700.1	GES,TPS04,TPS4	terpene synthase 04	(E)-nerolidol/(E,E)-geranyl linalool synthase	terpene; linalool	AT1G61120.1	0	1	1	1	1	0	1	1	1	2	0
Sapur.004G064300	Sapur.004G064300.1	GGPS1	geranylgeranyl pyrophosphate synthase 1	geranylgeranyl diphosphate synthase	terpene	AT4G36810.1	1	1	1	1	1	1	1	1	1	1	1
Sapur.004G121200	Sapur.004G121200.1	ERG9,SQS1	squalene synthase 1	squalene synthase	squalene	AT4G34640.1	2	1	1	2	2	2	2	1	1	1	2
Sapur.004G126500	Sapur.004G126500.1	LAP5	Chalcone and stilbene synthase family protein	chalcone synthase family protein	chalcone	AT4G34850.1	2	2	2	2	2	2	2	1	1	1	1
Sapur.004G135300	Sapur.004G135300.1	GGR	geranylgeranyl reductase	NA	terpene; total volatiles	AT4G38460.1	2	1	1	1	1	1	1	2	1	1	1
Sapur.005G091000	Sapur.005G091000.1		Chalcone-flavanone isomerase family protein	NA	chalcone	AT5G66230.1	0	1	2	1	1	0	1	0	0	1	0
Sapur.005G093900	Sapur.005G093900.1	CYP84A1,FAH1	ferulic acid 5-hydroxylase 1	coniferyl aldehyde 5-hydroxylase	kaempferol-3-O-glucoside	AT4G36220.1	1	2	2	3	1	1	1	2	1	1	1
Sapur.005G101800	Sapur.005G101800.1	GGPS1	geranylgeranyl pyrophosphate synthase 1	geranylgeranyl pyrophosphate synthase	terpene	AT4G36810.1	1	1	1	1	2	1	1	1	1	1	1
Sapur.005G121400	Sapur.005G121400.1	SQE1,XF1	FAD/NAD(P)-binding oxidoreductase family protein	squalene monooxygenase	squalene	AT1G58440.1	1	1	1	0	0	0	1	2	1	1	3
Sapur.005G162000	Sapur.005G162000.1	PSY	PHYTOENE SYNTHASE	phytoene synthase	phytoene	AT5G17230.1	1	1	1	1	1	1	1	1	1	1	1
Sapur.006G005500	Sapur.006G005500.1	HYR1	UDP-Glycosyltransferase superfamily protein	UDP-glucose flavonoid 3-O-glucosyltransferase, putative	phenolic glycoside	AT3G21760.1	0	0	0	1	1	0	0	0	0	0	1
Sapur.006G005600	Sapur.006G005600.1	UGT71B6	UDP-glucosyl transferase 71B6	UDP-glucose flavonoid 3-O-glucosyltransferase	phenolic glycoside	AT3G21780.1	0	0	0	1	1	0	0	0	0	0	2
Sapur.006G005700	Sapur.006G005700.1		UDP-Glycosyltransferase superfamily protein	anthocyanidin 3-O-glucosyltransferase	phenolic glycoside	AT3G21790.1	0	0	0	1	1	0	0	0	0	0	1
Sapur.006G005800	Sapur.006G005800.1		UDP-Glycosyltransferase superfamily protein	UDP-glucose flavonoid 3-O-glucosyltransferase	phenolic glycoside	AT3G21790.1	0	0	0	1	1	0	0	0	0	0	1
Sapur.006G005900	Sapur.006G005900.1	HYR1	UDP-Glycosyltransferase superfamily protein	anthocyanidin 3-O-glucosyltransferase	phenolic glycoside	AT3G21760.1	0	0	0	1	1	0	0	0	0	0	1
Sapur.006G007500	Sapur.006G007500.1	UGT71C4	UDP-glucosyl transferase 71C4	UDP-glucose flavonoid 3-O-glucosyltransferase, putative	phenolic glycoside	AT1G07250.1	1	1	0	1	1	0	1	0	0	0	1
Sapur.006G043300	Sapur.006G043300.1	IAGLU	indole-3-acetate beta-D-glucosyltransferase	UDP-glucose:flavonoid 7-O-glucosyltransferase	phenolic glycoside	AT4G15550.1	1	1	1	1	1	1	1	1	1	1	1
Sapur.006G064300	Sapur.006G064300.1	CAS1	cycloartenol synthase 1	oxidosqualene cyclase	squalene	AT2G07050.1	4	4	2	2	2	1	1	2	2	4	7
Sapur.006G180600	Sapur.006G180600.1		Chalcone-flavanone isomerase family protein	NA	chalcone	AT2G26310.1	1	2	3	1	2	2	2	2	1	1	1
Sapur.007G005700	Sapur.007G005700.1	SQE1,XF1	FAD/NAD(P)-binding oxidoreductase family protein	squalene monooxygenase	squalene	AT1G58440.1	1	1	2	0	0	0	2	1	1	2	1
Sapur.007G104900	Sapur.007G104900.1	ATTPS03,TPS03	terpene synthase 03	(E)-beta-ocimene synthase	terpene; beta-ocimene	AT4G16740.1	2	0	2	0	1	2	0	0	2	0	0
Sapur.007G105000	Sapur.007G105000.1	ATTPS03,TPS03	terpene synthase 03	(E)-beta-ocimene synthase	terpene; beta-ocimene	AT4G16740.1	1	1	0	0	1	0	0	0	0	0	0
Sapur.007G105100	Sapur.007G105100.1	ATTPS03,TPS03	terpene synthase 03	(E)-beta-ocimene synthase	terpene; beta-ocimene	AT4G16740.1	0	0	1	6	0	1	1	2	0	1	1
Sapur.007G113400	Sapur.007G113400.1	ATFTA,FTA,PFT/PGGT-IALPHA,PLP	farnesyltransferase A	protein farnesyltransferase/geranylgeranyltransferase type-1 subunit alpha	terpene; farnesene	AT3G59380.1	1	1	1	1	1	1	1	1	1	1	1
Sapur.008G042400	Sapur.008G042400.5	ATGGT-IB,GGB,PGGT-I	Prenyltransferase family protein	geranylgeranyltransferase type I beta subunit	terpene	AT2G39550.1	0	0	0	0	0	0	0	0	0	0	0
Sapur.008G112400	Sapur.008G112400.1	DRL1	dihydroflavonol 4-reductase-like1	NA	isosalicin	AT4G35420.1	1	1	1	2	2	1	2	2	1	1	1
Sapur.008G157500	Sapur.008G157500.3	ADT2	arogenate dehydratase 2	arogenate/prephenate dehydratase	isosalicin	AT3G07630.1	0	1	0	0	0	0	0	0	1	0	0
Sapur.009G016200	Sapur.009G016200.1		2-oxoglutarate (2OG) and Fe(II)-dependent oxygenase superfamily protein	flavonol synthase/flavanone 3-hydroxylase, putative	flavenoid	AT4G25300.1	3	1	1	1	1	2	2	1	1	1	2
Sapur.009G018600	Sapur.009G018600.1		2-oxoglutarate (2OG) and Fe(II)-dependent oxygenase superfamily protein	flavonol synthase/flavanone 3-hydroxylase, putative	flavenoid	AT4G25300.1	2	3	3	3	1	2	3	2	1	1	1
Sapur.009G061400	Sapur.009G061400.1	UGT78D2	UDP-glucosyl transferase 78D2	UDP-glucose:flavonoid 3-O-glucosyltransferase	phenolic glycoside	AT5G17050.1	1	1	1	1	1	1	1	1	1	1	1
Sapur.009G064200	Sapur.009G064200.1	SQE1,XF1	FAD/NAD(P)-binding oxidoreductase family protein	squalene monooxygenase	squalene	AT1G58440.1	0	0	0	0	0	0	0	0	0	0	0
Sapur.009G097600	Sapur.009G097600.1	ERG9,SQS1	squalene synthase 1	squalene synthase	squalene	AT4G34640.1	2	2	1	1	1	2	1	1	3	2	2
Sapur.009G098000	Sapur.009G098000.1	CYP84A1,FAH1	ferulic acid 5-hydroxylase 1	coniferyl aldehyde 5-hydroxylase	prunin	AT4G36220.1	1	1	1	1	1	1	1	1	1	1	1
Sapur.009G106000	Sapur.009G106000.1	UGT78D2	UDP-glucosyl transferase 78D2	UDP-glucose:flavonoid 3-O-glucosyltransferase, putative	phenolic glycoside	AT5G17050.1	2	1	1	1	1	2	1	2	1	2	0
Sapur.009G106100	Sapur.009G106100.1	UGT78D2	UDP-glucosyl transferase 78D2	UDP-glucose:flavonoid 3-O-glucosyltransferase	phenolic glycoside; prunin	AT5G17050.1	1	3	1	1	1	1	1	0	3	1	4
Sapur.009G111200	Sapur.009G111200.1	GGR	geranylgeranyl reductase	geranylgeranyl pyrophosphate synthase	terpene	AT4G38460.1	1	1	1	1	1	1	2	1	1	1	1
Sapur.009G117800	Sapur.009G117800.1	ADT6	arogenate dehydratase 6	arogenate/prephenate dehydratase	prunin	AT1G08250.1	1	1	2	1	1	1	1	1	1	1	1
Sapur.009G123100	Sapur.009G123100.1		Pyridine nucleotide-disulphide oxidoreductase family protein	geranylgeranyl reductase	terpene	AT1G74470.1	2	2	2	1	1	1	1	1	2	1	2
Sapur.010G016400	Sapur.010G016400.1		2-oxoglutarate (2OG) and Fe(II)-dependent oxygenase superfamily protein	flavonol synthase/flavanone 3-hydroxylase, putative	flavenoid; tremulacin	AT3G21420.1	2	1	1	2	3	1	1	2	1	3	1
Sapur.010G054200	Sapur.010G054200.13	ATRGTA1,RGTA1	RAB geranylgeranyl transferase alpha subunit 1	Rab geranylgeranyl transferase-like protein, putative	terpene	AT4G24490.2	0	0	0	0	0	0	0	0	0	0	0
Sapur.010G054200	Sapur.010G054200.7	ATRGTA1,RGTA1	RAB geranylgeranyl transferase alpha subunit 1	Rab geranylgeranyl transferase-like protein, putative	terpene	AT4G24490.2	0	0	0	0	0	0	0	0	0	0	0
Sapur.010G054300	Sapur.010G054300.1	ATRGTA1,RGTA1	RAB geranylgeranyl transferase alpha subunit 1	NA	terpene	AT4G24490.1	0	1	0	0	0	0	0	0	0	0	0
Sapur.010G054400	Sapur.010G054400.1	ATRGTA1,RGTA1	RAB geranylgeranyl transferase alpha subunit 1	NA	terpene	AT4G24490.1	0	0	0	0	0	0	0	0	0	0	0
Sapur.010G054600	Sapur.010G054600.4	ATRGTA1,RGTA1	RAB geranylgeranyl transferase alpha subunit 1	NA	terpene	AT4G24490.2	0	0	0	0	0	0	0	0	0	0	0
Sapur.010G054600	Sapur.010G054600.1	ATRGTA1,RGTA1	RAB geranylgeranyl transferase alpha subunit 1	NA	terpene	AT4G24490.1	0	0	0	0	0	1	2	1	0	1	0
Sapur.010G054900	Sapur.010G054900.1	ATRGTA1,RGTA1	RAB geranylgeranyl transferase alpha subunit 1	NA	terpene	AT4G24490.1	0	0	0	0	0	0	0	0	0	0	0
Sapur.010G055600	Sapur.010G055600.1	ATRGTA1,RGTA1	RAB geranylgeranyl transferase alpha subunit 1	NA	terpene	AT4G24490.2	0	0	0	0	0	0	0	0	0	0	0
Sapur.010G096200	Sapur.010G096200.1		NAD(P)-binding Rossmann-fold superfamily protein	dihydroflavonol 4-reductase, putative	flavenoid; benzeneacetaldehyde	AT1G68540.1	1	1	3	1	1	1	1	2	1	1	1
Sapur.010G108700	Sapur.010G108700.5	GPPS,GPS1	geranyl diphosphate synthase 1	geranyl diphosphate synthase	terpene	AT2G34630.2	0	0	0	0	0	0	0	0	0	0	0
Sapur.010G169300	Sapur.010G169300.1	A11,CFI,TT5	Chalcone-flavanone isomerase family protein	chalcone-flavonone isomerase	chalcone; isosalipurposide; chalconaringenin 4'-glucoside; catechin; naringenin; prunin; salipurposide; flavenoid	AT3G55120.1	1	1	2	1	1	1	1	1	1	1	1
Sapur.011G018900	Sapur.011G018900.1	ATTPS03,TPS03	terpene synthase 03	alpha-farnesene synthase	terpene; farnesene	AT4G16740.1	1	0	1	1	0	1	1	1	1	0	0
Sapur.011G018900	Sapur.011G018900.2	ATTPS03,TPS03	terpene synthase 03	alpha-farnesene synthase	terpene; farnesene	AT4G16740.1	0	1	1	1	1	0	0	0	0	1	1
Sapur.011G019500	Sapur.011G019500.1	ATTPS14,TPS14	terpene synthase 14	(3S)-linalool/(E)-nerolidol/(E,E)-geranyl linalool synthase	terpene; linalool	AT1G61680.1	1	2	2	2	2	3	2	1	2	3	0
Sapur.011G066600	Sapur.011G066600.1		Chalcone-flavanone isomerase family protein	chalcone isomerase	chalcone	AT1G53520.1	1	2	1	2	0	2	1	1	1	1	1
Sapur.012G022600	Sapur.012G022600.1	UGT88A1	UDP-glucosyl transferase 88A1	UDP-sugar flavonoid 7-O-glycosyltransferase	phenolic glycoside	AT3G16520.3	1	3	1	3	2	1	0	1	2	2	0
Sapur.012G049800	Sapur.012G049800.1		Pyridine nucleotide-disulphide oxidoreductase family protein	geranylgeranyl diphosphate reductase	terpene	AT1G74470.1	1	1	1	2	0	1	2	1	2	2	2
Sapur.012G106500	Sapur.012G106500.1	ATCHS,CHS,TT4	Chalcone and stilbene synthase family protein	NA	chalcone	AT5G13930.1	1	1	1	1	1	1	1	1	0	0	1
Sapur.013G011500	Sapur.013G011500.3	AtRGTB2,RGTB2	RAB geranylgeranyl transferase beta subunit 2	RAB geranylgeranyl transferase type II beta subunit, putative	terpene	AT3G12070.1	0	0	0	0	0	0	0	0	0	0	0
Sapur.013G025400	Sapur.013G025400.1		glycosyltransferase family protein 28	UDP-N-acetylglucosamine transferase subunit alg13	kaempferol-3-O-glucoside	AT4G16710.2	0	0	0	1	0	1	1	1	0	1	1
Sapur.013G109700	Sapur.013G109700.1	UGT78D2	UDP-glucosyl transferase 78D2	UDP-glucose:flavonoid 3-O-glucosyltransferase	phenolic glycoside	AT5G17050.1	1	0	1	2	1	2	1	1	1	1	0
Sapur.013G127700	Sapur.013G127700.1	UGT78D2	UDP-glucosyl transferase 78D2	UDP-glucose:flavonoid 3-O-glucosyltransferase	phenolic glycoside	AT5G17050.1	1	2	1	2	1	3	3	2	2	1	1
Sapur.013G136100	Sapur.013G136100.1	TPS02	terpene synthase 02	NA	terpene	AT4G16730.1	2	1	1	1	1	0	1	1	0	1	1
Sapur.013G136400	Sapur.013G136400.1	TPS10	terpene synthase 10	NA	terpene	AT2G24210.1	0	0	0	0	0	0	0	0	0	0	0
Sapur.013G136500	Sapur.013G136500.1	TPS02	terpene synthase 02	NA	terpene	AT4G16730.1	3	0	0	0	0	1	0	0	2	2	0
Sapur.014G042800	Sapur.014G042800.1	LAP6	Chalcone and stilbene synthase family protein	chalcone synthase family protein, putative	chalcone	AT1G02050.1	1	1	2	1	1	1	1	1	1	1	1
Sapur.014G117800	Sapur.014G117800.1	ATCHS,CHS,TT4	Chalcone and stilbene synthase family protein	chalcone synthase	chalcone	AT5G13930.1	1	1	2	1	1	1	1	1	1	1	1
Sapur.016G011400	Sapur.016G011400.1	UGT71C4	UDP-glucosyl transferase 71C4	UDP-glucose flavonoid 3-O-glucosyltransferase, putative	phenolic glycoside	AT1G07250.1	0	2	1	1	2	0	0	0	0	0	1
Sapur.016G011500	Sapur.016G011500.1	HYR1	UDP-Glycosyltransferase superfamily protein	UDP-glucose flavonoid 3-O-glucosyltransferase, putative	phenolic glycoside	AT3G21760.1	1	0	0	1	1	1	0	0	0	0	0
Sapur.016G011600	Sapur.016G011600.1	UGT71C4	UDP-glucosyl transferase 71C4	UDP-glucose flavonoid 3-O-glucosyltransferase, putative	phenolic glycoside	AT1G07250.1	1	1	1	2	2	1	1	1	1	1	1
Sapur.016G013000	Sapur.016G013000.1	HYR1	UDP-Glycosyltransferase superfamily protein	UDP-glucose flavonoid 3-O-glucosyltransferase, putative	phenolic glycoside	AT3G21760.1	0	1	0	1	1	0	0	0	0	0	1
Sapur.016G013100	Sapur.016G013100.1	UGT71B1	UDP-glucosyl transferase 71B1	UDP-glucose flavonoid 3-O-glucosyltransferase	phenolic glycoside	AT3G21750.1	0	4	0	1	1	0	0	0	0	0	1
Sapur.016G013200	Sapur.016G013200.1	UGT71B6	UDP-glucosyl transferase 71B6	UDP-glucose flavonoid 3-O-glucosyltransferase	phenolic glycoside	AT3G21780.1	0	2	0	1	1	0	0	0	0	0	0
Sapur.016G013300	Sapur.016G013300.1	UGT71B6	UDP-glucosyl transferase 71B6	UDP-glucose flavonoid 3-O-glucosyltransferase	phenolic glycoside	AT3G21780.1	0	1	0	1	1	0	0	0	0	0	1
Sapur.016G013400	Sapur.016G013400.1		UDP-Glycosyltransferase superfamily protein	UDP-glucose flavonoid 3-O-glucosyltransferase	phenolic glycoside	AT3G21790.1	0	4	0	2	2	0	0	0	0	0	3
Sapur.016G013500	Sapur.016G013500.1	UGT71B6	UDP-glucosyl transferase 71B6	UDP-glucose flavonoid 3-O-glucosyltransferase	phenolic glycoside	AT3G21780.1	0	2	0	1	1	0	0	0	0	0	2
Sapur.016G013600	Sapur.016G013600.1	UGT71B6	UDP-glucosyl transferase 71B6	UDP-glucose flavonoid 3-O-glucosyltransferase	phenolic glycoside	AT3G21780.1	0	3	0	1	2	0	0	0	0	0	6
Sapur.016G013800	Sapur.016G013800.1	UGT71B6	UDP-glucosyl transferase 71B6	UDP-glucose flavonoid 3-O-glucosyltransferase	phenolic glycoside	AT3G21780.1	0	2	0	0	0	0	0	0	0	0	1
Sapur.016G014200	Sapur.016G014200.1	HYR1	UDP-Glycosyltransferase superfamily protein	UDP-glucose flavonoid 3-O-glucosyltransferase, putative	phenolic glycoside	AT3G21760.1	0	3	0	2	2	0	0	0	0	0	1
Sapur.016G014300	Sapur.016G014300.1	HYR1	UDP-Glycosyltransferase superfamily protein	UDP-glucose flavonoid 3-O-glucosyltransferase	phenolic glycoside	AT3G21760.1	0	1	0	0	0	0	0	0	0	0	1
Sapur.016G046900	Sapur.016G046900.1	IAGLU	indole-3-acetate beta-D-glucosyltransferase	UDP-glucose:flavonoid 7-O-glucosyltransferase	phenolic glycoside	AT4G15550.1	1	1	1	1	1	1	1	1	1	1	1
Sapur.016G071600	Sapur.016G071600.1	ATCAD6,CAD6	cinnamyl alcohol dehydrogenase 6	cinnamyl alcohol dehydrogenase-like protein	benzeneacetaldehyde	AT4G37970.1	1	1	1	1	0	0	1	2	2	0	0
Sapur.016G184400	Sapur.016G184400.1	ATTPS21,TPS21	terpene synthase 21	terpene synthase	terpene	AT5G23960.2	1	1	1	2	1	1	1	0	1	1	1
Sapur.016G185200	Sapur.016G185200.1	ATTPS-CIN,TPS-CIN	terpene synthase-like sequence-1,8-cineole	pinene synthase	terpene; pinene	AT3G25820.1	1	0	0	0	1	0	0	0	0	0	0
Sapur.016G185600	Sapur.016G185600.1	ATTPS-CIN,TPS-CIN	terpene synthase-like sequence-1,8-cineole	pinene synthase	terpene; pinene	AT3G25820.1	1	0	1	1	1	1	1	1	0	0	0
Sapur.016G226700	Sapur.016G226700.1	ATSRG1,SRG1	senescence-related gene 1	flavonol synthase/flavanone 3-hydroxylase, putative	flavenoid	AT1G17020.1	1	1	1	2	1	1	1	1	0	1	0
Sapur.016G226800	Sapur.016G226800.1	ATSRG1,SRG1	senescence-related gene 1	flavonol synthase/flavanone 3-hydroxylase, putative	flavenoid	AT1G17020.1	1	0	1	2	2	2	1	0	1	2	3
Sapur.016G226900	Sapur.016G226900.1	ATSRG1,SRG1	senescence-related gene 1	flavonol synthase/flavanone 3-hydroxylase, putative	flavenoid	AT1G17020.1	3	1	1	2	2	2	4	2	2	2	2
Sapur.016G245200	Sapur.016G245200.1	ATSRG1,SRG1	senescence-related gene 1	flavonol synthase/flavanone 3-hydroxylase, putative	flavenoid	AT1G17020.1	1	1	1	1	1	2	1	2	1	1	1
Sapur.016G270700	Sapur.016G270700.1		UDP-Glycosyltransferase superfamily protein	UDP-glucose flavonoid 3-O-glucosyltransferase, putative	phenolic glycoside	AT3G21790.1	0	1	0	2	1	0	0	0	0	0	1
Sapur.016G273600	Sapur.016G273600.1	ATTPS21,TPS21	terpene synthase 21	terpene synthase	terpene	AT5G23960.2	2	1	0	1	0	0	0	0	2	0	0
Sapur.016G273700	Sapur.016G273700.1	ATTPS21,TPS21	terpene synthase 21	terpene synthase	terpene	AT5G23960.2	2	2	1	2	2	4	0	2	3	1	0
Sapur.016G273900	Sapur.016G273900.1	ATTPS21,TPS21	terpene synthase 21	terpene synthase	terpene	AT5G23960.2	1	1	0	3	0	0	0	0	0	0	0
Sapur.017G031100	Sapur.017G031100.1	ATTPS03,TPS03	terpene synthase 03	isoprene synthase	terpene; isoprene	AT4G16740.2	2	0	0	0	1	0	0	0	0	0	0
Sapur.017G031200	Sapur.017G031200.1	ATTPS03,TPS03	terpene synthase 03	isoprene synthase	terpene; isoprene	AT4G16740.1	2	3	3	2	2	3	0	2	3	1	1
Sapur.017G036200	Sapur.017G036200.1		2-oxoglutarate (2OG) and Fe(II)-dependent oxygenase superfamily protein	flavonol synthase/flavanone 3-hydroxylase	flavenoid	AT2G36690.1	0	0	2	0	1	0	0	0	2	1	0
Sapur.017G037800	Sapur.017G037800.1		2-oxoglutarate (2OG) and Fe(II)-dependent oxygenase superfamily protein	flavonol synthase/flavanone 3-hydroxylase, putative	flavenoid	AT2G36690.1	0	0	2	0	4	4	1	2	0	1	0
Sapur.017G037800	Sapur.017G037800.2		2-oxoglutarate (2OG) and Fe(II)-dependent oxygenase superfamily protein	flavonol synthase/flavanone 3-hydroxylase, putative	flavenoid	AT2G36690.1	0	0	3	0	1	1	0	0	0	1	0
Sapur.017G114300	Sapur.017G114300.1	PSY	PHYTOENE SYNTHASE	phytoene synthase	phytoene	AT5G17230.1	0	1	0	0	0	0	1	0	0	0	2
Sapur.018G037100	Sapur.018G037100.1		Chalcone-flavanone isomerase family protein	chalcone-flavanone isomerase	chalcone; flavenoid	AT2G26310.1	1	2	1	1	1	1	3	1	3	2	2
Sapur.018G071400	Sapur.018G071400.1	UGT78D2	UDP-glucosyl transferase 78D2	UDP-glucose:flavonoid 3-O-glucosyltransferase	phenolic glycoside	AT5G17050.1	1	1	1	1	1	1	1	1	1	1	1
Sapur.019G013500	Sapur.019G013500.1	ATFLS1,FLS,FLS1	flavonol synthase 1	flavonol synthase/flavanone 3-hydroxylase	flavenoid	AT5G08640.2	1	1	1	4	1	2	2	1	1	1	1
Sapur.019G014100	Sapur.019G014100.1	ATFLS1,FLS,FLS1	flavonol synthase 1	NA	flavenoid	AT5G08640.1	1	1	0	0	0	0	0	0	0	0	0
Sapur.019G014200	Sapur.019G014200.1	ATFLS1,FLS,FLS1	flavonol synthase 1	NA	flavenoid	AT5G08640.1	0	0	0	0	0	0	0	0	0	0	0
Sapur.019G014500	Sapur.019G014500.1	ATTPS21,TPS21	terpene synthase 21	NA	terpene	AT5G23960.2	0	1	0	0	0	0	0	0	0	0	0
Sapur.019G014600	Sapur.019G014600.1	ATTPS21,TPS21	terpene synthase 21	NA	terpene	AT5G23960.2	0	0	0	0	0	0	0	0	0	0	0
Sapur.019G014700	Sapur.019G014700.1	ATTPS21,TPS21	terpene synthase 21	NA	terpene	AT5G23960.2	0	0	0	1	0	0	1	0	0	2	0
Sapur.019G014800	Sapur.019G014800.1	ATTPS21,TPS21	terpene synthase 21	NA	terpene	AT5G23960.2	0	1	0	0	0	0	0	0	0	0	0
Sapur.019G015200	Sapur.019G015200.1	ATTPS03,TPS03	terpene synthase 03	NA	terpene	AT4G16740.2	0	0	0	0	1	1	2	0	0	0	0
Sapur.019G015500	Sapur.019G015500.1	ATTPS03,TPS03	terpene synthase 03	beta-pinene synthase	terpene; beta-pinene	AT4G16740.1	3	0	2	1	0	3	1	2	1	0	0
Sapur.019G023900	Sapur.019G023900.1	SQE1,XF1	FAD/NAD(P)-binding oxidoreductase family protein	squalene monooxygenase	squalene	AT1G58440.1	0	0	10	0	0	0	4	4	3	1	2
Sapur.019G023900	Sapur.019G023900.2	SQE1,XF1	FAD/NAD(P)-binding oxidoreductase family protein	squalene monooxygenase	squalene	AT1G58440.1	8	6	3	0	0	0	7	3	1	2	1
Sapur.019G024100	Sapur.019G024100.1	ATTPS21,TPS21	terpene synthase 21	terpene synthase	terpene	AT5G23960.1	0	1	0	1	0	0	1	0	0	0	0
Sapur.019G027600	Sapur.019G027600.1	ATTPS21,TPS21	terpene synthase 21	terpene synthase, putative	terpene	AT5G23960.2	0	0	0	0	0	0	0	0	0	0	0
Sapur.019G045500	Sapur.019G045500.1		HXXXD-type acyl-transferase family protein	benzoyl coenzyme A: benzyl alcohol benzoyl transferase	unknown glucoside	AT5G17540.1	2	2	1	1	1	1	1	2	0	0	1
Sapur.019G047800	Sapur.019G047800.1		Terpenoid cyclases/Protein prenyltransferases superfamily protein	beta-pinene synthase	terpene; beta-pinene	AT3G25810.1	3	0	2	4	3	4	2	1	1	0	0
Sapur.019G048000	Sapur.019G048000.1	SQE1,XF1	FAD/NAD(P)-binding oxidoreductase family protein	squalene monooxygenase	squalene	AT1G58440.1	1	0	3	0	0	0	0	2	1	0	2
Sapur.019G055800	Sapur.019G055800.1	4CL3	4-coumarate:CoA ligase 3	4-coumarate:CoA ligase	unknown glucoside	AT1G65060.1	1	1	1	1	1	1	1	1	1	1	1
Sapur.019G061200	Sapur.019G061200.1		Chalcone-flavanone isomerase family protein	chalcone-flavonone isomerase	chalcone; flavenoid; unknown glucoside	AT5G05270.1	0	1	1	1	2	0	1	1	1	1	1
Sapur.15WG043300	Sapur.15WG043300.1	GGR	geranylgeranyl reductase	polyprenyl synthetase	terpene	AT4G38460.1	1	1	1	1	2	2	1	0	1	1	1
Sapur.15WG080500	Sapur.15WG080500.1		Pyridine nucleotide-disulphide oxidoreductase family protein	geranylgeranyl diphosphate reductase	terpene	AT1G74470.1	0	0	0	0	0	0	0	0	0	0	0
Sapur.15WG103000	Sapur.15WG103000.1	ATTPS21,TPS21	terpene synthase 21	sesquiterpene synthase	sesquiterpene	AT5G23960.1	0	0	0	0	0	0	0	0	0	0	0
Sapur.15WG103000	Sapur.15WG103000.1	ATTPS21,TPS21	terpene synthase 21	sesquiterpene synthase	terpene; sesquiterpene	AT5G23960.1	0	0	0	0	0	0	0	0	0	0	0
Sapur.15WG103200	Sapur.15WG103200.1	ATTPS21,TPS21	terpene synthase 21	sesquiterpene synthase	sesquiterpene	AT5G23960.1	0	0	0	0	0	0	0	0	0	0	0
Sapur.15WG103200	Sapur.15WG103200.1	ATTPS21,TPS21	terpene synthase 21	sesquiterpene synthase	terpene; sesquiterpene	AT5G23960.1	0	0	0	0	0	0	0	0	0	0	0
Sapur.15WG132200	Sapur.15WG132200.1	SQE1,XF1	FAD/NAD(P)-binding oxidoreductase family protein	squalene monooxygenase	squalene	AT1G58440.1	0	0	0	0	0	0	0	0	0	0	0
Sapur.T000100	Sapur.T000100.1	ATTPS21,TPS21	terpene synthase 21	terpene synthase, putative	terpene	AT5G23960.1	0	1	1	7	0	4	4	0	1	1	3
Sapur.T000200	Sapur.T000200.1	SQE3	squalene epoxidase 3	NA	squalene	AT4G37760.1	0	1	0	0	0	0	1	0	0	0	1
Sapur.T037500	Sapur.T037500.1		Chalcone-flavanone isomerase family protein	NA	chalcone	AT5G66230.1	0	0	1	0	0	0	0	0	1	1	1
Sapur.T037700	Sapur.T037700.1		Chalcone-flavanone isomerase family protein	NA	chalcone	AT5G66230.1	0	0	0	0	0	0	0	0	0	0	0
Sapur.T038500	Sapur.T038500.1		Chalcone-flavanone isomerase family protein	NA	chalcone	AT5G66230.1	0	0	0	0	0	0	0	0	0	0	0
Sapur.T143900	Sapur.T143900.1		Chalcone-flavanone isomerase family protein	chalcone-flavanone isomerase family protein, putative	chalcone; flavenoid	AT5G66230.1	2	2	2	1	2	2	1	1	1	0	0
Sapur.T148800	Sapur.T148800.1	ATRGTA2,RGTA2	RAB geranylgeranyl transferase alpha subunit 2	NA	terpene	AT5G41820.1	0	0	0	0	0	0	0	0	0	0	0
