# Supplementary figures and images for: <em>De Novo</em> Assembly and Annotation of 11 Diverse Shrub Willow (<em>Salix</em>) Genomes Reveals Novel Gene Organization in Sex-Linked Regions
Source: Preprints.org preprint supplement (doi:10.20944/preprints202212.0185.v1), 2022-12-12

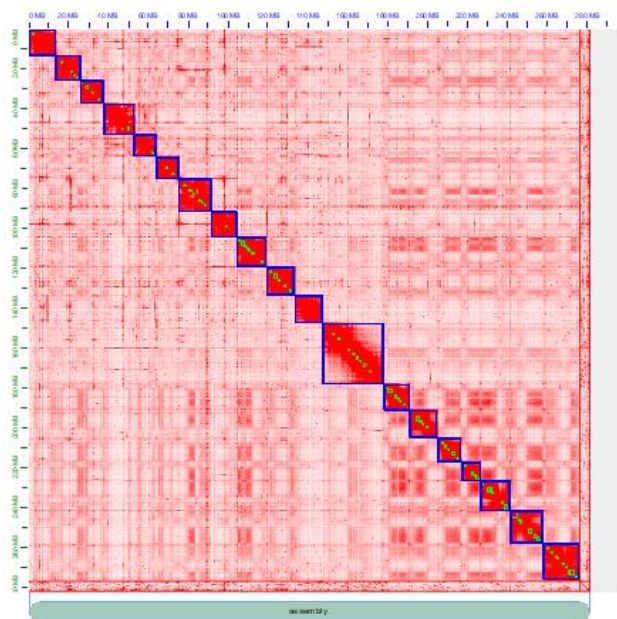

JORR

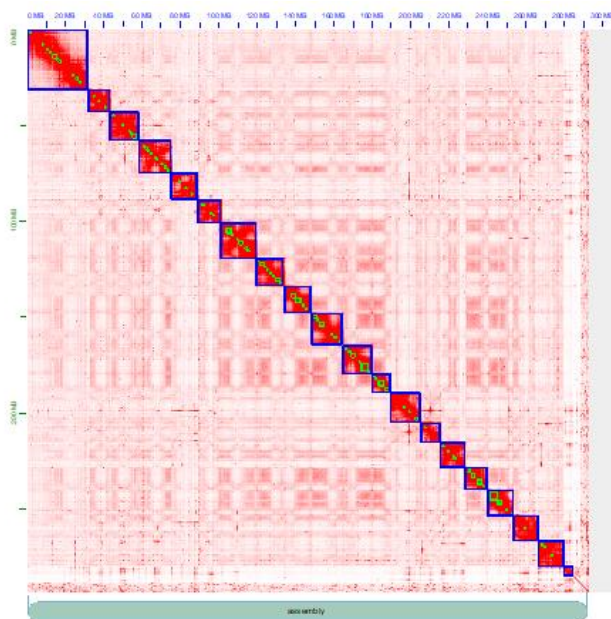

MBG

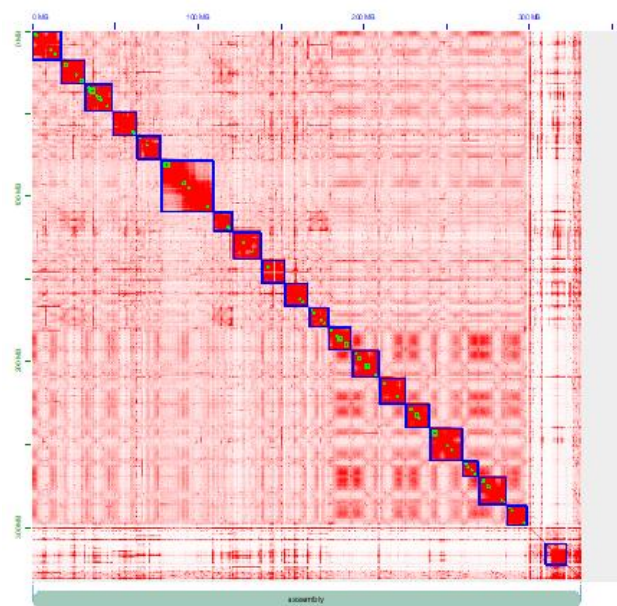

94001

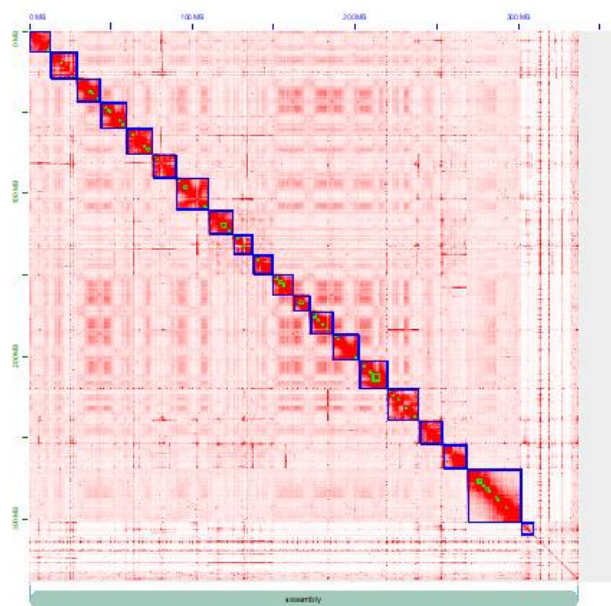

94006



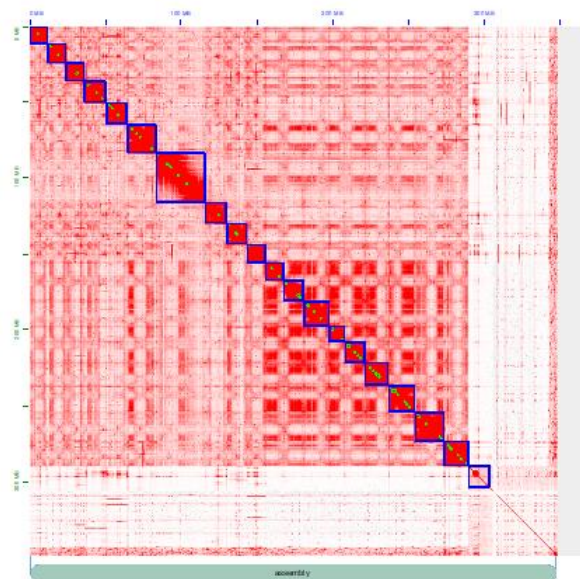

04-FF-016

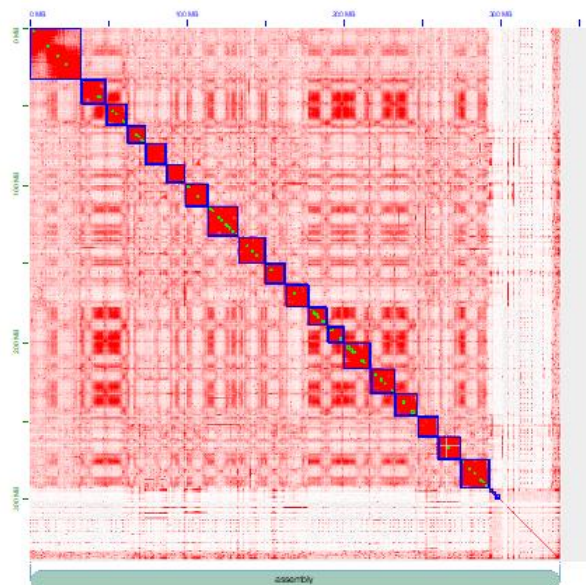

SH-3

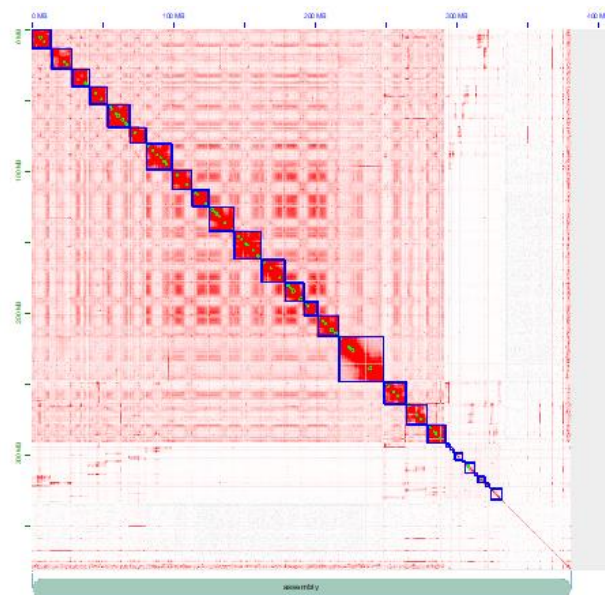

P295

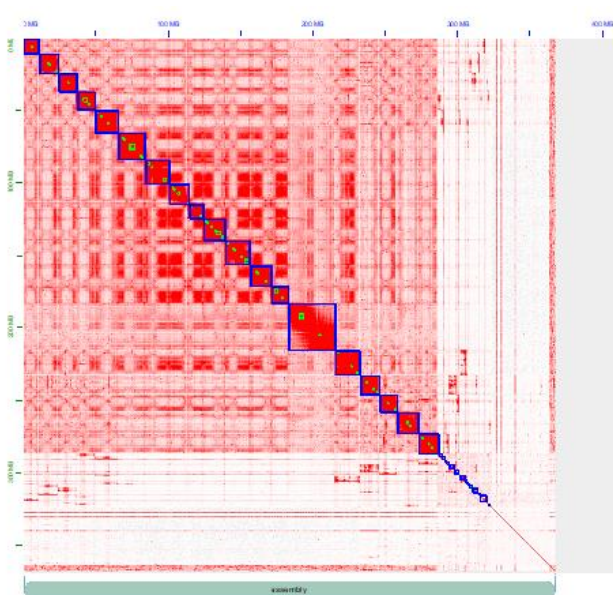

P63

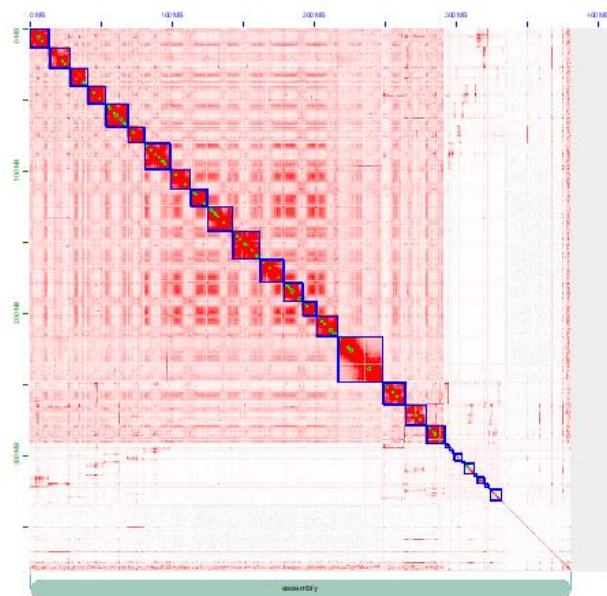

P295

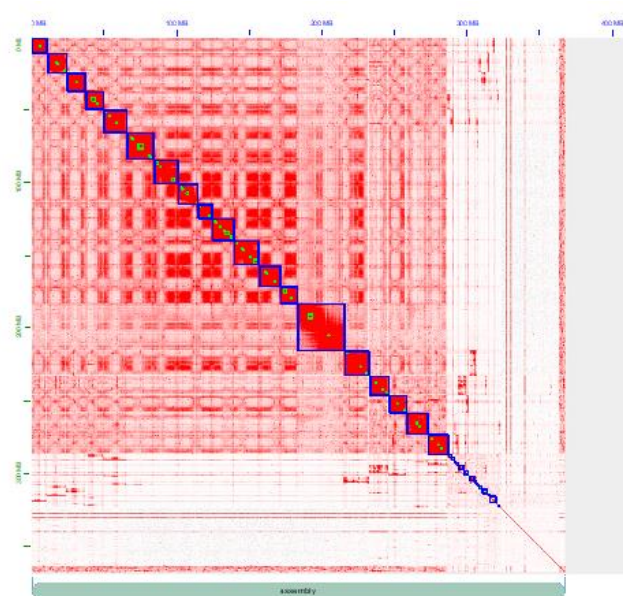

P63

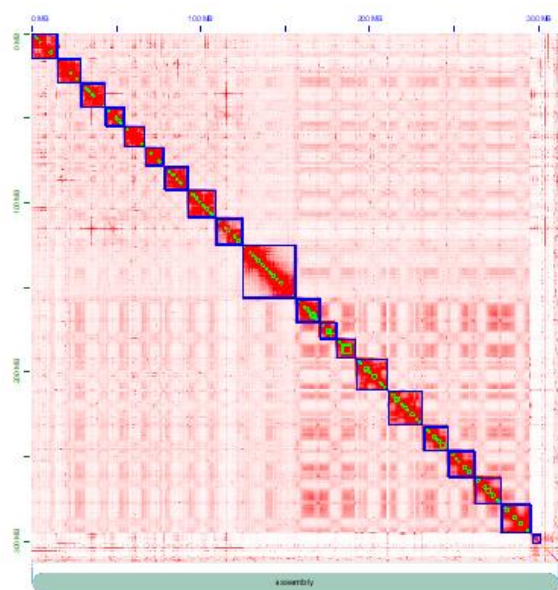

P336

Supplement: Supplementary file 1 [file supplementary]

**A**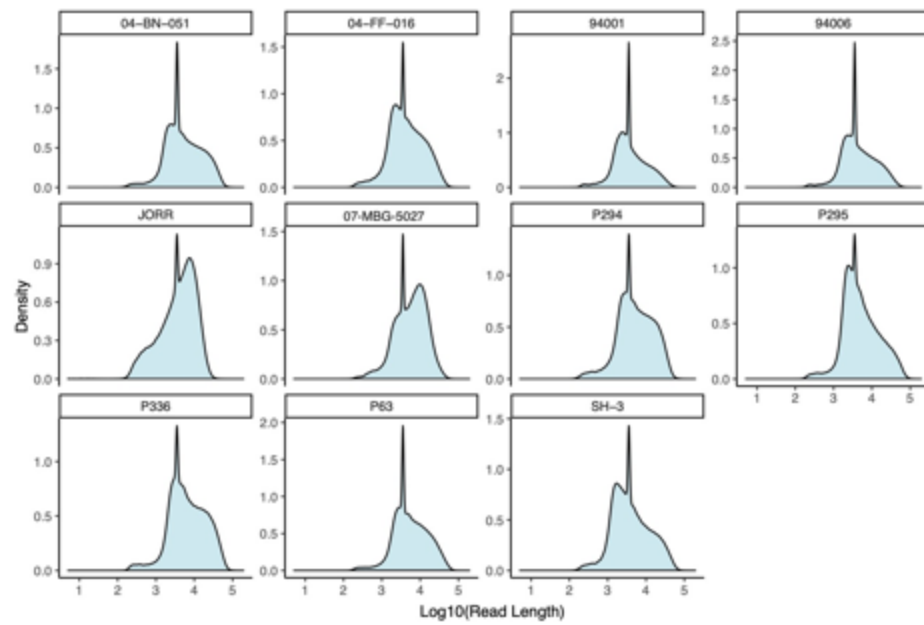**B**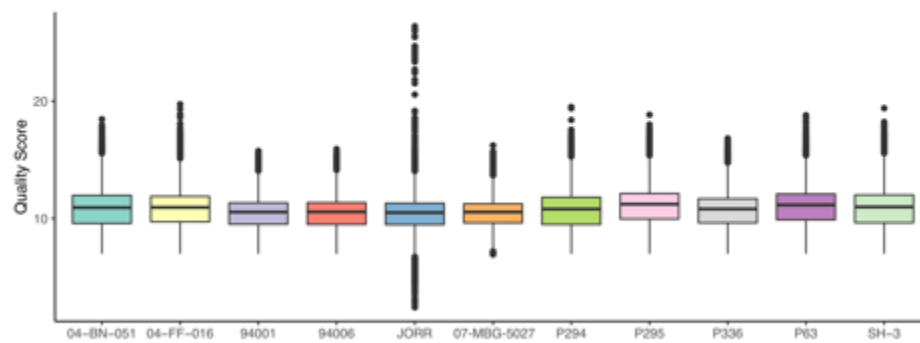

Supplement: Supplementary file 2 [file supplementary]

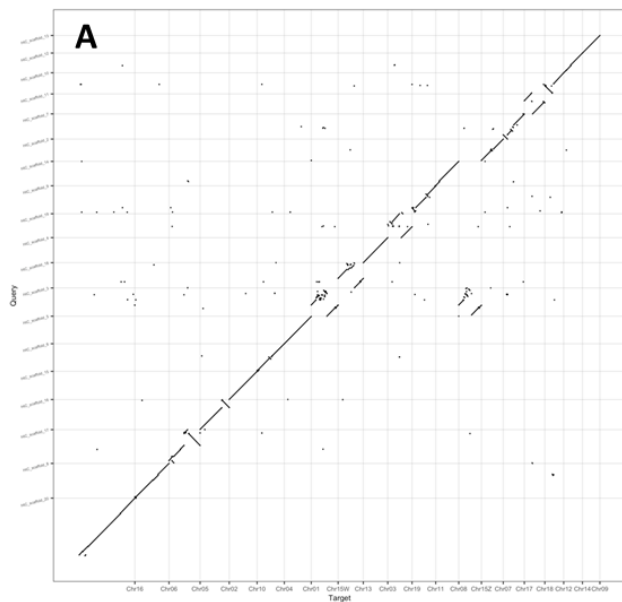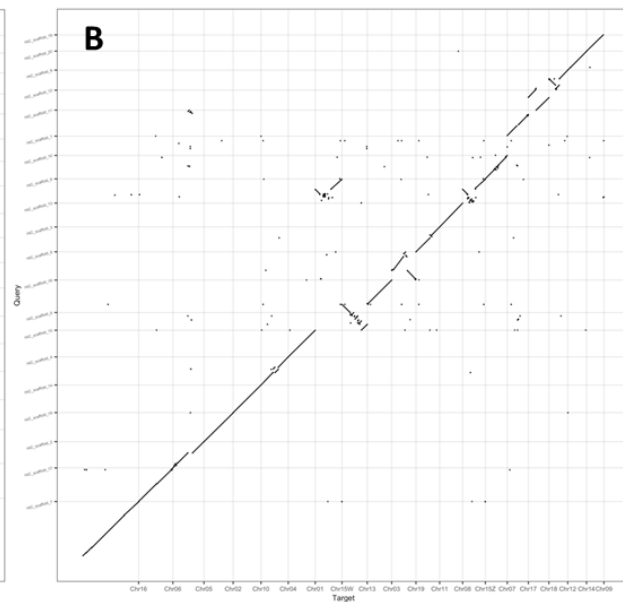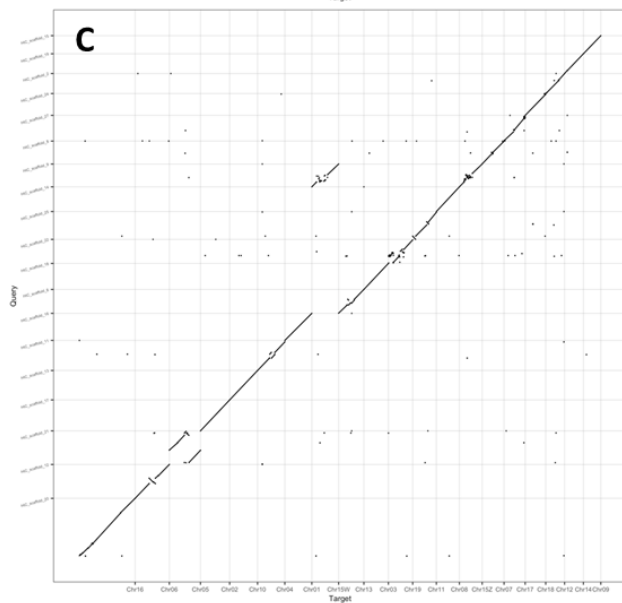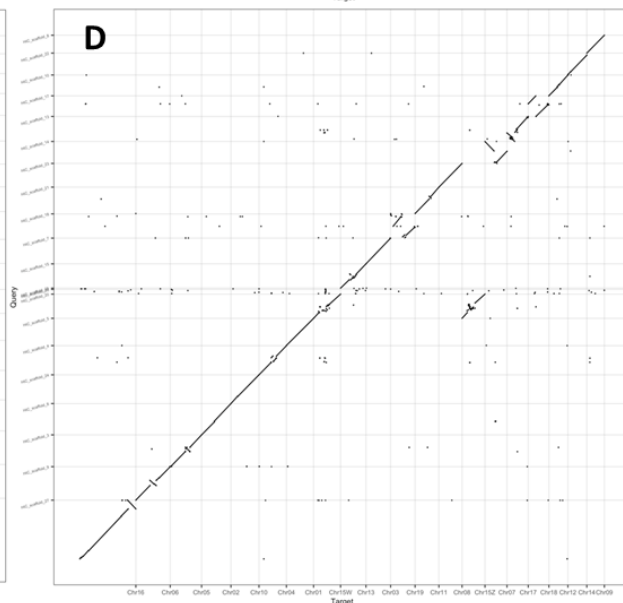

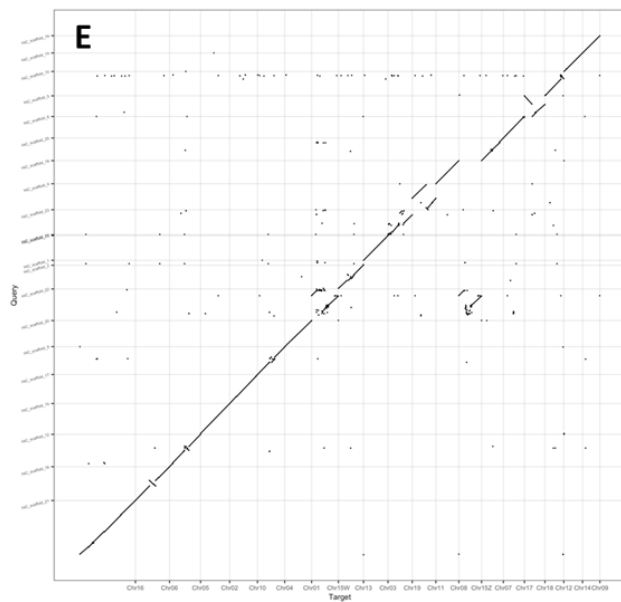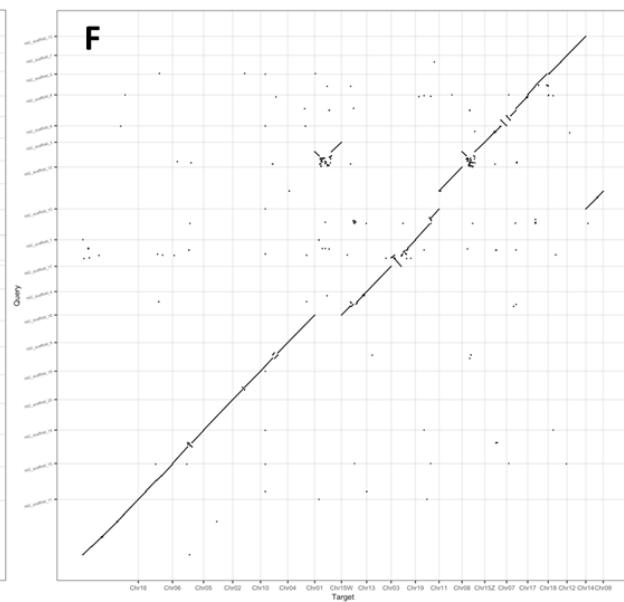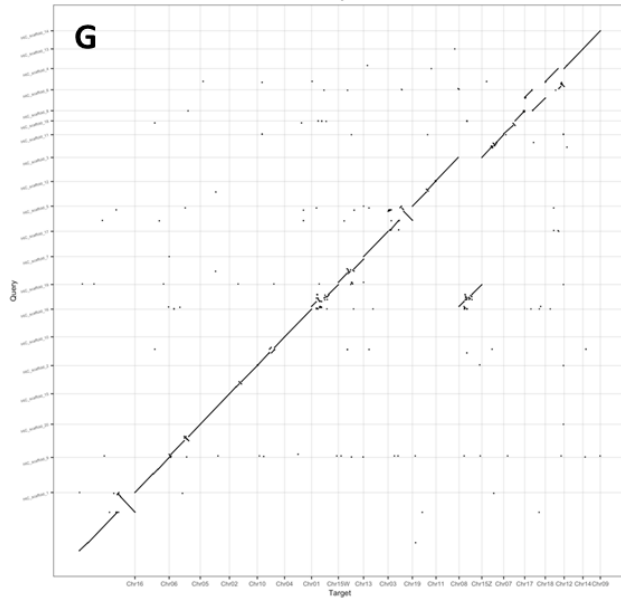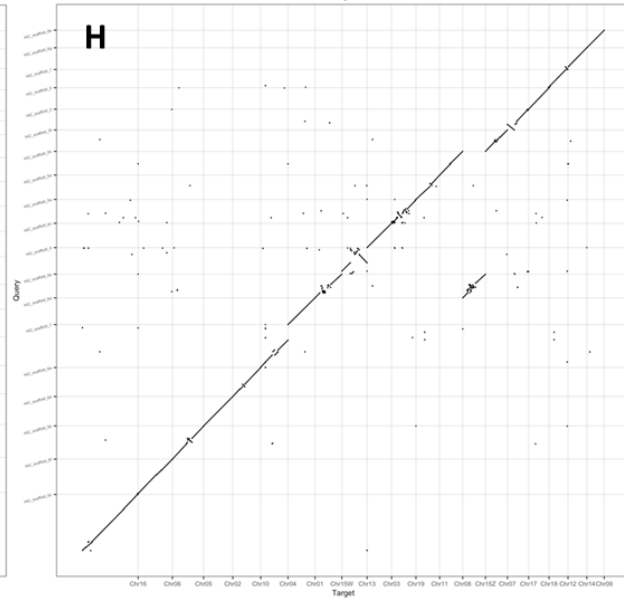

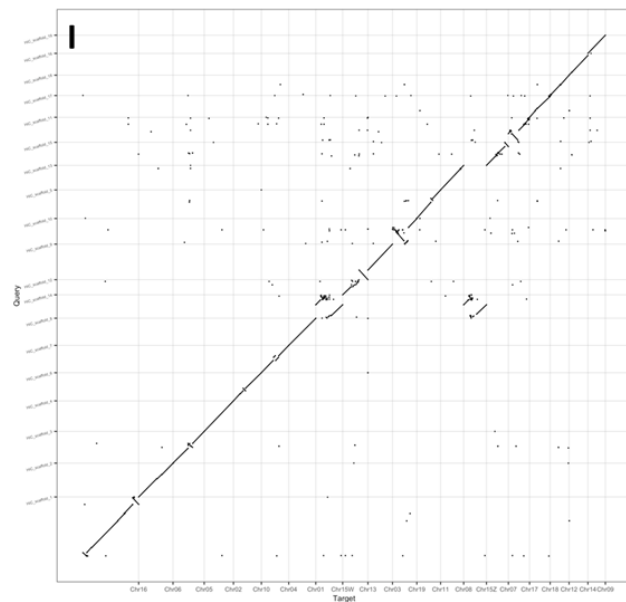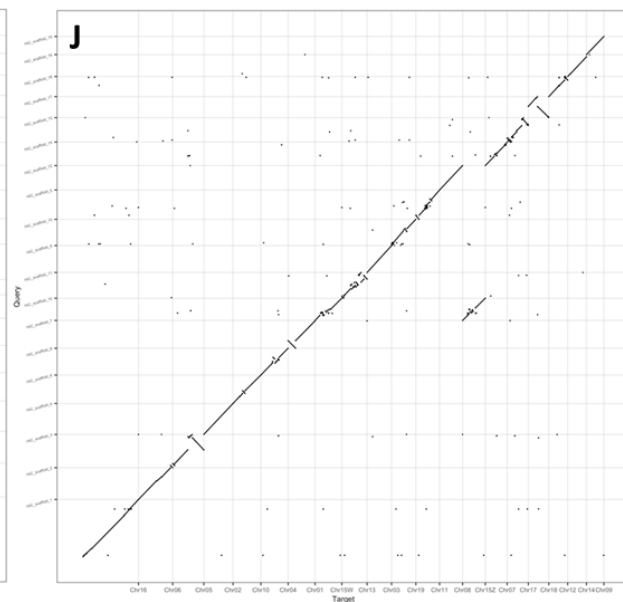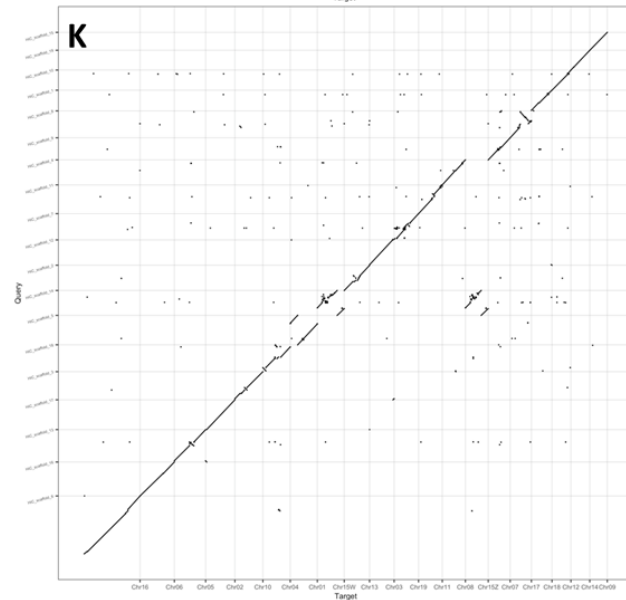

Supplement: Supplementary file 3 [file supplementary]
